# Supplementary material
Source: MDPI journal article supplement (https://www.mdpi.com/2072-4292/15/5/1262)
Supplement: s1 [file s1 › remotesensing-1920717-supplementary.pdf]

# Supplementary Materials: COVID-19 Pandemic: Impacts on Air Quality during Partial Lockdown in the Metropolitan Area of São Paulo

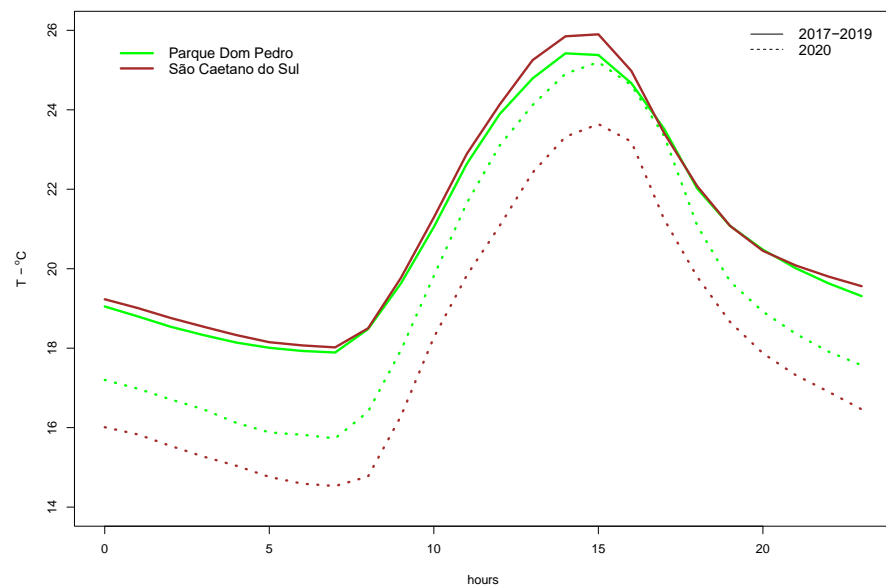

**Figure S1.** Average hourly temperature for MASP during April-May of 2017-2019 (pre-pandemic) and 2020 (during the pandemic), from AQMS at Pq. Dom Pedro and Sao Caetano do Sul.

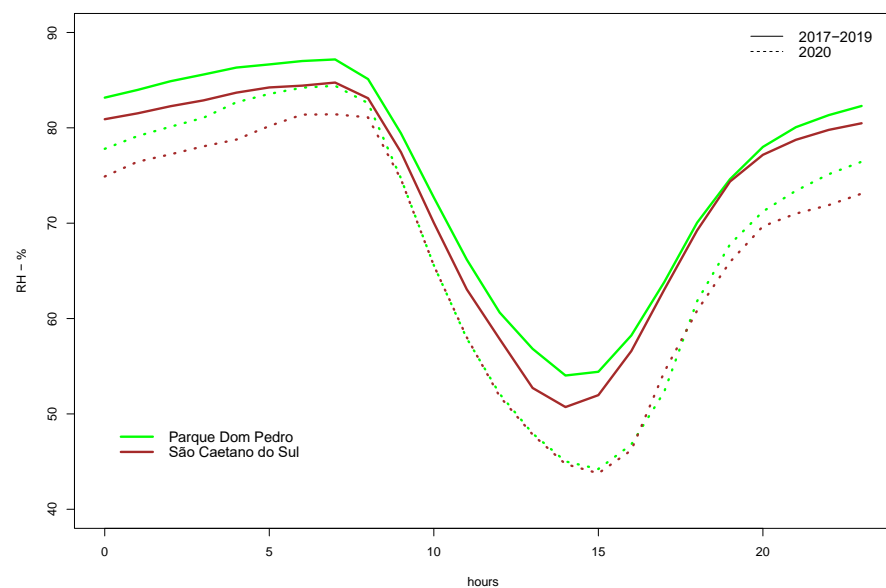

**Figure S2.** Average hourly relative humidity for MASP during April-May of 2017-2019 (pre-pandemic) and 2020 (during the pandemic), from AQMS at Pq. Dom Pedro and Sao Caetano do Sul.

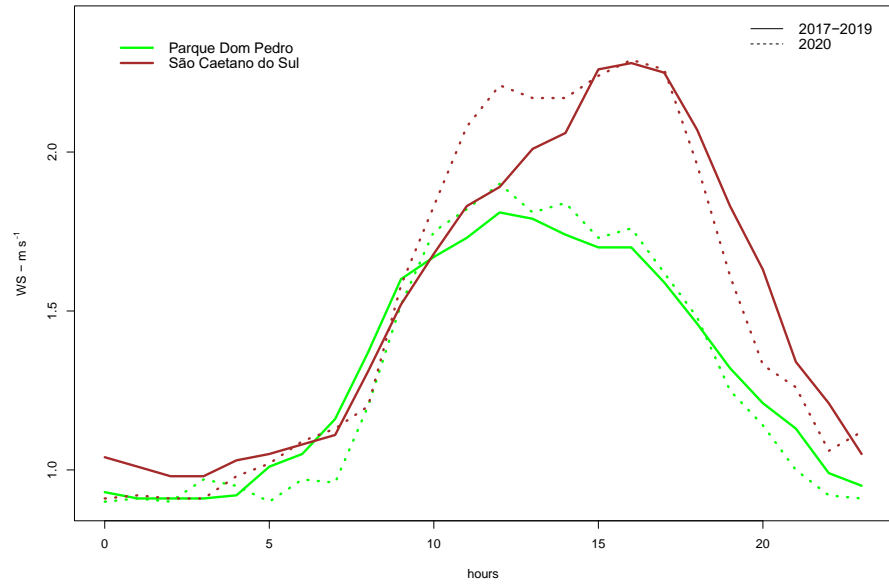

**Figure S3.** Average hourly wind speed for MASP during April-May of 2017-2019 (pre-pandemic) and 2020 (during the pandemic), from AQMS at Pq. Dom Pedro and Sao Caetano do Sul.

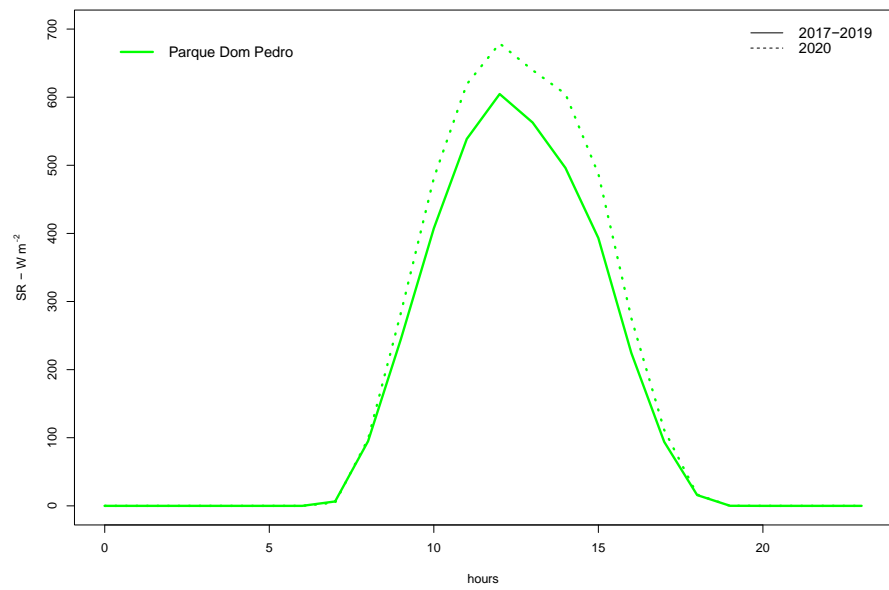

**Figure S4.** Average hourly global solar radiation for MASP during April-May of 2017-2019 (pre-pandemic) and 2020 (during the pandemic), from AQMS at Pq. Dom Pedro.

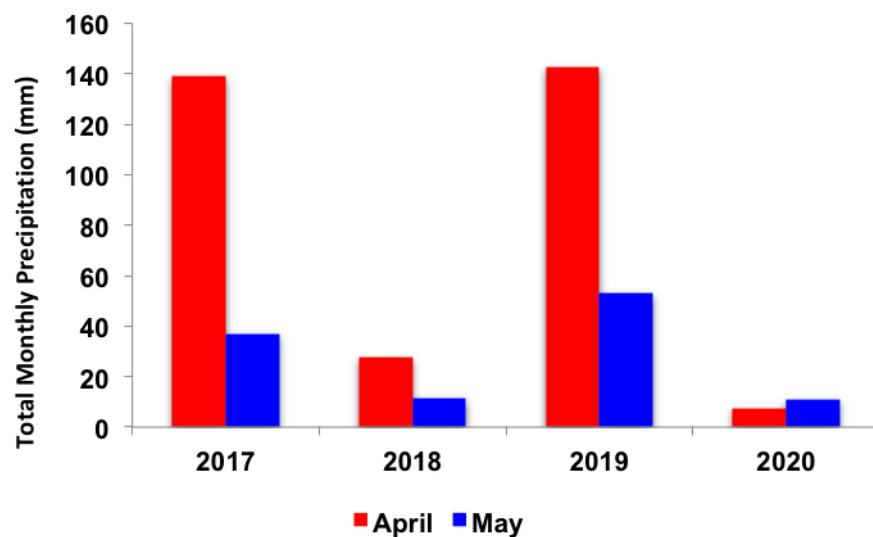

**Figure S5.** Total monthly precipitation for MASP during April-May of 2017-2019 (pre-pandemic) and 2020 (during the pandemic) from INMET data.

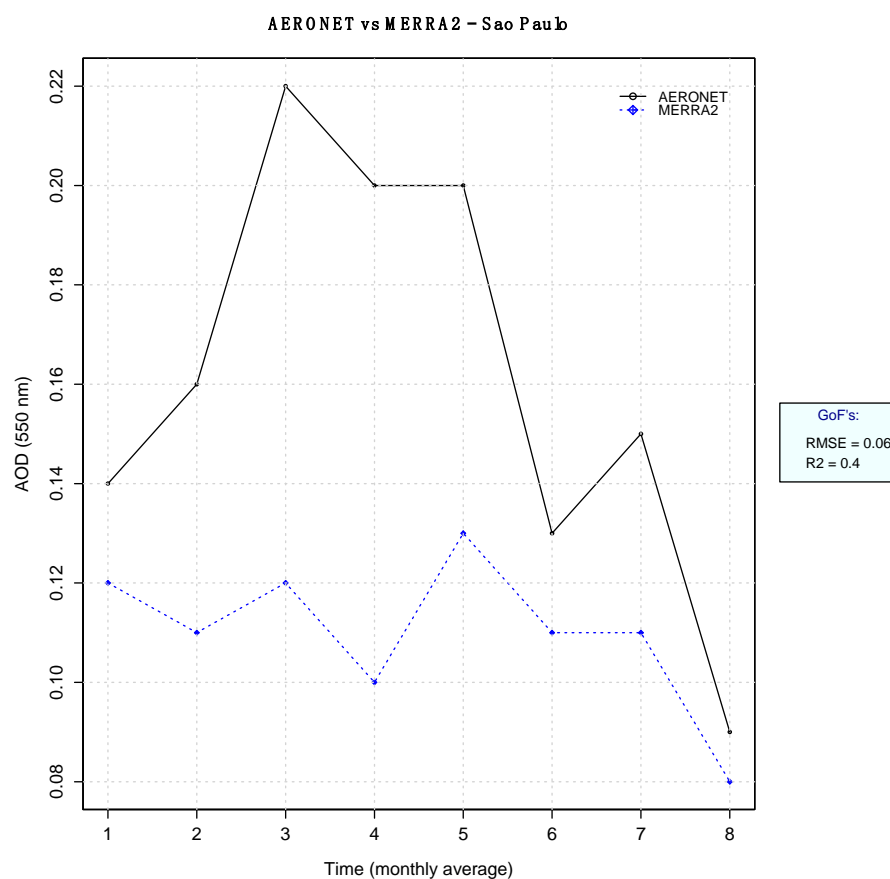

**Figure S6.** Comparison of monthly average AOD (550 nm) during April and May of 2020 (pandemic) and during the same period of 2017, 2018, 2019 (pre-pandemic) from AERONET versus MERRA-2 data.
